# Supplementary material for: Development and validation of a sequential two-step algorithm for the screening of individuals with potential polycythaemia vera
Source: PubMed Central journal article supplement (PMC7794224; doi:10.1038/s41598-020-80459-y), 2021-01-08
Supplement: 41598_2020_80459_MOESM1_ESM.pdf [file 41598_2020_80459_MOESM1_ESM.pdf]

# DEVELOPMENT AND VALIDATION OF A SEQUENTIAL TWO-STEP ALGORITHM FOR THE SCREENING OF INDIVIDUALS WITH POTENTIAL POLYCYTHAEMIA VERA

\*Miguel Piris-Villaespesa, MD<sup>1,2</sup>; Alberto Álvarez-Larrán, MD, PhD<sup>3</sup>; Adolfo Saez-Marín, MD<sup>1</sup>; Claudia Nuñez-Torrón, MD<sup>1</sup>; Gloria Muñoz-Martin, PhD<sup>4</sup>; Ricardo Sánchez, MD, PhD<sup>5</sup>; Francisco J. del Castillo PhD<sup>4,6,7</sup>; Jesús Villarrubia MD, PhD<sup>1</sup>; Javier Lopez-Jimenez, MD, PhD<sup>1</sup>; Joaquin Martinez-Lopez, MD, PhD<sup>5, 8, 9</sup> and \*Valentin Garcia-Gutierrez, MD, PhD<sup>1,2</sup>.

<sup>1</sup> Haematology Department, Hospital Universitario Ramón y Cajal, Madrid, Spain.

<sup>2</sup> Instituto Ramón y Cajal de investigación Sanitaria (IRYCIS), Madrid.

<sup>3</sup> Haematology Department, Hospital Clínic, IDIBAPS, Barcelona, Spain.

<sup>4</sup> Translational Genomics Unit, Hospital Universitario Ramón y Cajal (IRYCIS), Madrid.

<sup>5</sup> Haematology Department, Hospital Universitario 12 de Octubre, Madrid.

<sup>6</sup> Genetics Department, Hospital Universitario Ramón y Cajal, Madrid.

<sup>7</sup> Centro de Investigación Biomédica en Red de Enfermedades Raras (CIBERER), Madrid.

<sup>8</sup> Complutense University of Madrid, Madrid

<sup>9</sup> Centro Nacional de Investigaciones Oncológicas, Madrid

\*Corresponding author: Miguel Piris Villaespesa; mpirisv@gmail.com, +34913368368  
Valentin Garcia-Gutierrez; jvalentingg@gmail.com

Abstract word count: 197

Text word count: 2596

Figures: 4

Tables: 3

Keywords: Polycythaemia Vera, *JAK2* p.V617F, algorithm, screening, myeloproliferative neoplasm

| Phase   | Patient | Sex | Age | Hb<br>(g/dl) | Htcto<br>(%) | WBC<br>( $\times 10^9/L$ ) | Neutrophils<br>( $\times 10^9/L$ ) | Platelets<br>( $\times 10^9/L$ ) | MCV  | RDW  | MCH  | MCHC | JAK2<br>VAF<br>(%) | CV<br>events |
|---------|---------|-----|-----|--------------|--------------|----------------------------|------------------------------------|----------------------------------|------|------|------|------|--------------------|--------------|
| Phase 1 | 1       | M   | 66  | 15           | 49,5         | 6,05                       | 3,42                               | 290                              | 92,7 | 13,2 | 28   | 30,2 | 7,69               | no           |
|         | 2       | M   | 61  | 16,2         | 50           | 7,83                       | 3,42                               | 281                              | 95   | 13,1 | 30,8 | 32,5 | 0,92               | no           |
|         | 3       | M   | 71  | 16,3         | 49,8         | 8,56                       | 6,05                               | 734                              | 91   | 13,4 | 29,7 | 32,7 | 15,4               | yes          |
|         | 4       | M   | 67  | 15,7         | 50,3         | 18,7                       | 14,5                               | 513                              | 87,9 | 22,2 | 27,4 | 31,2 | 40,2               | yes          |
|         | 5       | M   | 86  | 15,6         | 49,1         | 11,7                       | 6,01                               | 264                              | 90,4 | 14,2 | 28,7 | 31,7 | 1,32               | no           |
|         | 6       | F   | 82  | 17,6         | 54,8         | 9,93                       | 7,19                               | 465                              | 79,6 | 14,4 | 25,5 | 32,1 | 10,8               | no           |
|         | 7       | M   | 61  | 18,9         | 57,7         | 11,2                       | 8,35                               | 359                              | 85,9 | 17,6 | 28,2 | 32,8 | 25,3               | no           |
|         | 8       | M   | 62  | 16,6         | 48,9         | 11,5                       | 6,65                               | 249                              | 90,2 | 14,2 | 30,5 | 33,8 | 14,6               | yes          |
| Phase 2 | 9       | M   | 69  | 15,5         | 49,6         | 6,95                       | 2,78                               | 249                              | 81,3 | 13,6 | 25,3 | 31,2 | 49,5               | No           |
|         | 10      | F   | 62  | 16,2         | 49,6         | 10,1                       | 4,96                               | 265                              | 95,1 | 11,5 | 31,1 | 32,8 | 100                | No           |
|         | 11      | M   | 51  | 16,3         | 50,4         | 12,2                       | 7,39                               | 165                              | 98,9 | 13,2 | 32,1 | 32,5 | 17,4               | No           |
|         | 12      | M   | 69  | 18,1         | 55,3         | 12,2                       | 7,17                               | 244                              | 88   | 12,8 | 28,8 | 32,8 | 71,1               | No           |
|         | 13      | M   | 51  | 17,9         | 54,9         | 14,4                       | 6,99                               | 230                              | 93,1 | 12   | 30,4 | 32,6 | 61,2               | Yes          |
|         | 14      | M   | 77  | 16,3         | 49,4         | 8,63                       | 5,72                               | 170                              | 95   | 13,3 | 31,3 | 33   | 9,45               | Yes          |
|         | 15      | M   | 74  | 15,7         | 50,3         | 8,6                        | 5,65                               | 437                              | 85,9 | 13,3 | 26,9 | 31,3 | 45,8               | No           |

Supplementary Table S1: *JAK2* p.V617F patient characteristics: the results of the collected variables in the *JAK2* p.V617F patients (n=15) found among phases 1 and 2 are shown in this table. Abbreviations: *Hb*: haemoglobin; *WBC*: white blood cells; *MCV*: mean corpuscular volume; *RDW*: red cell distribution width; *MCH*: mean corpuscular haemoglobin; *MCHC*: mean corpuscular haemoglobin concentration, *VAF*: variant allele fraction; *CV*: cardiovascular; *M*: male; *F*: female
